# Supplementary material
Source: MDPI journal article supplement (https://www.mdpi.com/2313-4321/3/3/45)
Supplement: s1 [file s1]

# Sustainability Assessment of Waste Management System for Mexico City (Mexico)—Based on Analytic Hierarchy Process

Nina Tsydenova <sup>1,\*</sup>, Alethia Vázquez Morillas <sup>2</sup> and Arely Areanely Cruz Salas <sup>2</sup>

<sup>1</sup> School of Computing Science, Business Administration, Economics, and Law (Faculty II), Carl von Ossietzky University of Oldenburg; 26129 Oldenburg, Germany

<sup>2</sup> Energy Department, Area of sustainable technologies, Universidad Autónoma Metropolitana UAM—Azcapotzalco; 02200 Mexico City, Mexico; alethia@correo.azc.uam.mx (A.V.M.); areanelyc@gmail.com (A.A.C.S.)

\* Correspondence: nina.tsydenova@gmx.de; Tel.: +49-176-973-49877

## 1 Description of MBT plant Ecoparc 4 (Spain)

Ecoparc 4, in the metropolitan area of Barcelona, is a treatment plant with a total nominal capacity of 300.000 Mg per year, consisting of a capacity of 225.000 Mg per year of residual MSW and 75.000 Mg per year of separately collected organic waste. The plant is treating mainly residual MSW since the start of operation in November 2010. The treatment is based on the classic MBT concept with composting.

Process flow description:

From storage bunkers the waste is fed to three identical lines (30 Mg per hour each), that start with a screening of bulky materials in a trommel of 350x350 mm size. The screened overflow is incorporated in the plant residue, while the underflow enters a manual sorting line where glass, metals are removed. Subsequently, each material flow passes a bag opener and enters a large double section trommel screen (90 mm and 150x250 mm). The screening process generates three streams:

- <90 mm: predominantly organic fraction which is sent to the biological treatment after passing an over magnet for ferrous metals recovery;

- <150x250 mm: consists of mainly recoverable materials, in majority 3D shape objects, and is forwarded to the automatic sorting steps;
- >150x250 mm: consists in majority of 2D objects and is forwarded to automatic sorting steps.

All the streams recovered, and the remaining 3D residuals undergo a manual sorting process. The purity of material streams separated is increased, while additional materials are separated from the 3D residuals. The remaining materials form the main residue stream of the plant, which is sent to an incineration plant.

The fraction < 90 mm sorted out to be organic goes to windrow composting. However, the purity of the result product does not allow the compost to be used as a fertilizer, but it contributes to the volume reduction.

## 2 Mass flow diagram (MFD) of Baseline Scenario

Figure S1. Mass flow diagram of Baseline Scenario

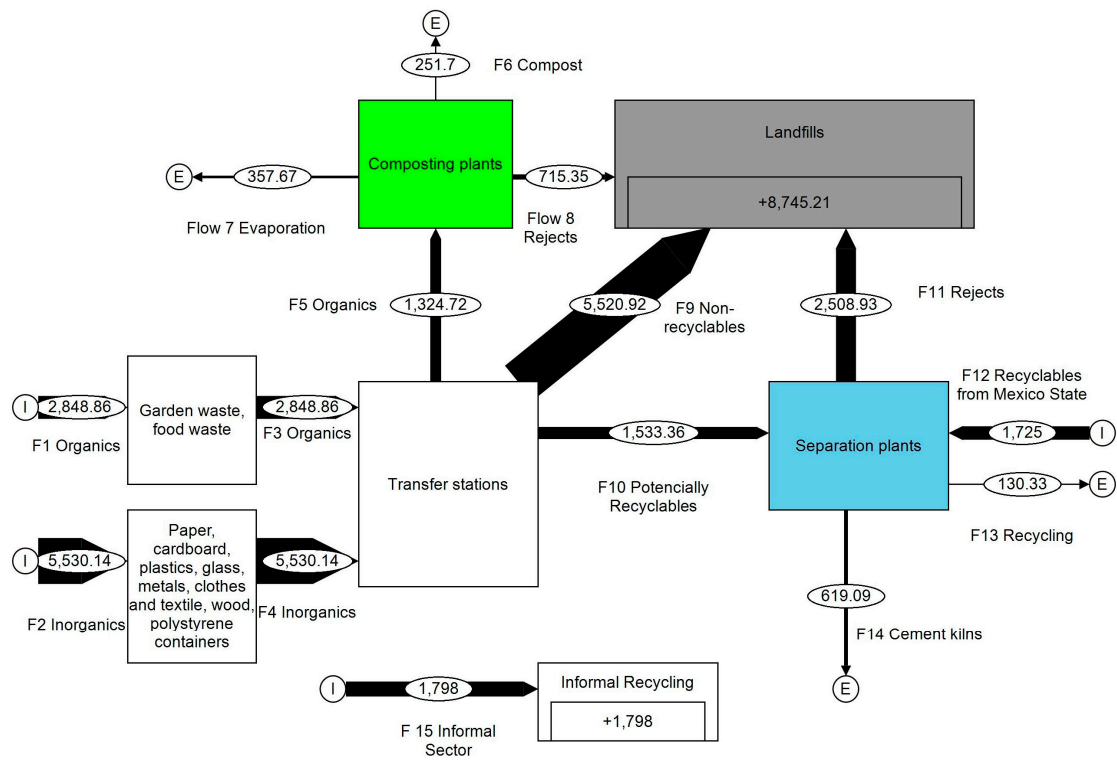

Table S1. Details of the flows of the MFD of Baseline Scenario

| Table S1   | Details of the flows of the MFD                                                                               |                                                            |                                                    |
|------------|---------------------------------------------------------------------------------------------------------------|------------------------------------------------------------|----------------------------------------------------|
| Waste flow | Description                                                                                                   | Method of estimation                                       | Information source                                 |
| F1         | MSW collected as "organics" by municipal workers                                                              | Calculated of 34 % of 8379 Mg of collected waste           | Waste generation: SEDEMA (2016)                    |
| F2         | MSW collected as "inorganics" by municipal workers                                                            | Calculated of 66% of 8379 Mg of collected waste            | Waste generation: SEDEMA (2016)                    |
| F3         | "Organics" delivered to the transfer station                                                                  | Calculated of 34 % of 8379 Mg of collected waste           | Waste generation: SEDEMA (2016)                    |
| F4         | "Inorganics" delivered to the transfer station                                                                | Calculated of 66% of 8379 Mg of collected waste            | Waste generation: SEDEMA (2016)                    |
| F5         | Sorted organic fraction of MSW (OFMSW)                                                                        | Figure reported by SEDEMA (2016)                           | SEDEMA (2016)                                      |
| F6         | Produced compost ready for sale                                                                               | Figure reported by SEDEMA (2016)                           | SEDEMA (2016)                                      |
| F7         | Evaporation (water and volatile solids)                                                                       | Figure estimated by authors based on Andersen et al (2010) | Estimate by authors based on Andersen et al (2010) |
| F8         | Sorted residues which are not suitable for composting                                                         | Calculated by the authors (F5-F6-F7)                       | Estimate by authors                                |
| F9         | Inorganic waste not suitable for recycling process                                                            | Figure reported by SEDEMA (2016)                           | SEDEMA (2016)                                      |
| F10        | Recyclable material from the mixed waste (plastics, paper, cardboard, all metals, glass, textile and wood)    | Figure reported by SEDEMA (2016)                           | SEDEMA (2016)                                      |
| F11        | Rejected material from separation plants                                                                      | Figure reported by SEDEMA (2016)                           | SEDEMA (2016)                                      |
| F12        | Recyclable material imported from Mexico State                                                                | Figure reported by SEDEMA (2016)                           | SEDEMA (2016)                                      |
| F13        | Sorted material manually at separation plants, which go further to recycling                                  | Figure reported by SEDEMA (2016)                           | SEDEMA (2016)                                      |
| F14        | Sorted material at separation plants, which is not suitable for recycling, but is used as RDF at cement kilns | Figure reported by SEDEMA (2016)                           | SEDEMA (2016)                                      |
| F15        | Collection by informal sector                                                                                 | Figure reported by Gómez Flores and Quintero, 2011         | (Gómez Flores and Quintero, 2011)                  |
|            |                                                                                                               |                                                            |                                                    |

2 Mass flow diagram (MFD) of AD Scenario

Figure S2. Mass flow diagram of AD Scenario

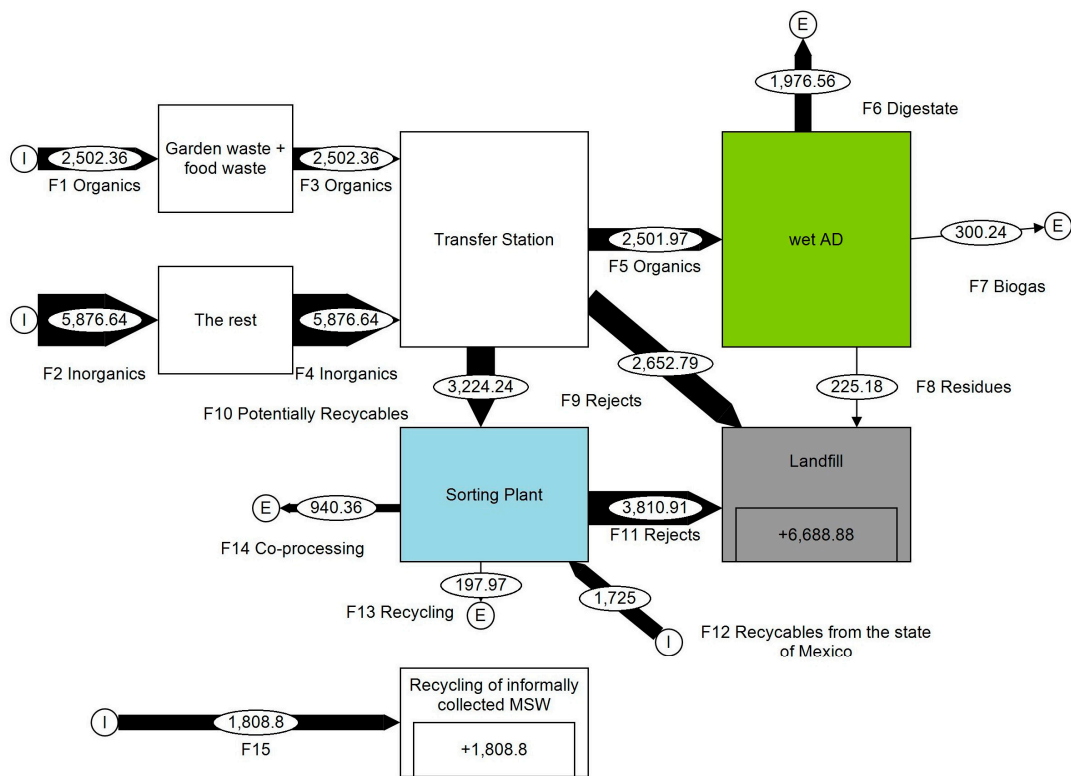

Table S2. Details of the flows of the MFD of AD Scenario

| Table S2   | Details of the flows of the MFD                                                                               |                                                                                                                                            |                                                                                                                  |
|------------|---------------------------------------------------------------------------------------------------------------|--------------------------------------------------------------------------------------------------------------------------------------------|------------------------------------------------------------------------------------------------------------------|
| Waste flow | Description                                                                                                   | Method of estimation                                                                                                                       | Information source                                                                                               |
| F1         | MSW collected "organics suitable for AD" by municipal workers (garden waste + vegetable waste)                | Calculated of 29.86 % of 8379 Mg of collected waste. 29.86% estimated by authors based on waste composition Figure 1.                      | Waste generation: SEDEMA (2016); estimate by authors-                                                            |
| F2         | MSW collected as "the rest" by municipal workers                                                              | Calculated of 70.14% of 8379 Mg of collected waste                                                                                         | Waste generation: SEDEMA (2016); estimate by authors.                                                            |
| F3         | "Organics suitable for AD " delivered to the transfer station                                                 | Calculated of 29.86 % of 8379 Mg of collected waste.                                                                                       | Waste generation: SEDEMA (2016)                                                                                  |
| F4         | "The rest" delivered to the transfer station                                                                  | Calculated of 70.14% of 8379 Mg of collected waste                                                                                         | Waste generation: SEDEMA (2016)                                                                                  |
| F5         | Organic fraction of MSW (OFMSW) suitable for AD delivered to the plant                                        | Calculated of 29.86 % of 8379 Mg of collected waste.                                                                                       | Waste generation: SEDEMA (2016); estimate by authors.                                                            |
| F6         | Produced digestate                                                                                            | (79% of the input) Figure reported by Österreichisches Bundesministerium für Land- und Forstwirtschaft, Umwelt und Wasserwirtschaft (2015) | Estimate by Österreichisches Bundesministerium für Land- und Forstwirtschaft, Umwelt und Wasserwirtschaft (2015) |
| F7         | Produced biogas                                                                                               | (12% of the input) Figure reported by Österreichisches Bundesministerium für Land- und Forstwirtschaft, Umwelt und Wasserwirtschaft (2015) | Estimate by Österreichisches Bundesministerium für Land- und Forstwirtschaft, Umwelt und Wasserwirtschaft (2015) |
| F8         | Sorted residues which are not suitable for AD                                                                 | Calculated by the authors (F5-F6-F7)                                                                                                       | Estimate by authors                                                                                              |
| F9         | Inorganic waste not suitable for recycling process                                                            | Calculated by the authors (F3+F4-F5-F10)                                                                                                   | Estimate by authors                                                                                              |
| F10        | Recyclable material from the mixed waste (plastics, paper, cardboard, all metals, glass, textile and wood)    | Figure reported by SEDEMA (2016)                                                                                                           | Estimate by authors                                                                                              |
| F11        | Rejected material from separation plants                                                                      | Figure reported by SEDEMA (2016)                                                                                                           | Estimate by authors                                                                                              |
| F12        | Recyclable material imported from Mexico State                                                                | Figure reported by SEDEMA (2016)                                                                                                           | SEDEMA (2016)                                                                                                    |
| F13        | Sorted material manually at separation plants, which go further to recycling                                  | (4%of the input)<br>Figure reported by SEDEMA (2016)                                                                                       | Estimate by authors                                                                                              |
| F14        | Sorted material at separation plants, which is not suitable for recycling, but is used as RDF at cement kilns | (19% of the input)<br>Figure reported by SEDEMA (2016)                                                                                     | Estimate by authors                                                                                              |
| F15        | Collection by informal sector                                                                                 | (14% of the MSW generated) Figure reported by Gómez Flores and Quintero, 2011                                                              | Gómez Flores and Quintero, 2011)                                                                                 |

3 Mass flow diagram (MFD) of Mechanical-Biological Treatment (MBT) Scenario

Figure S3. Mass flow diagram of MBT Scenario

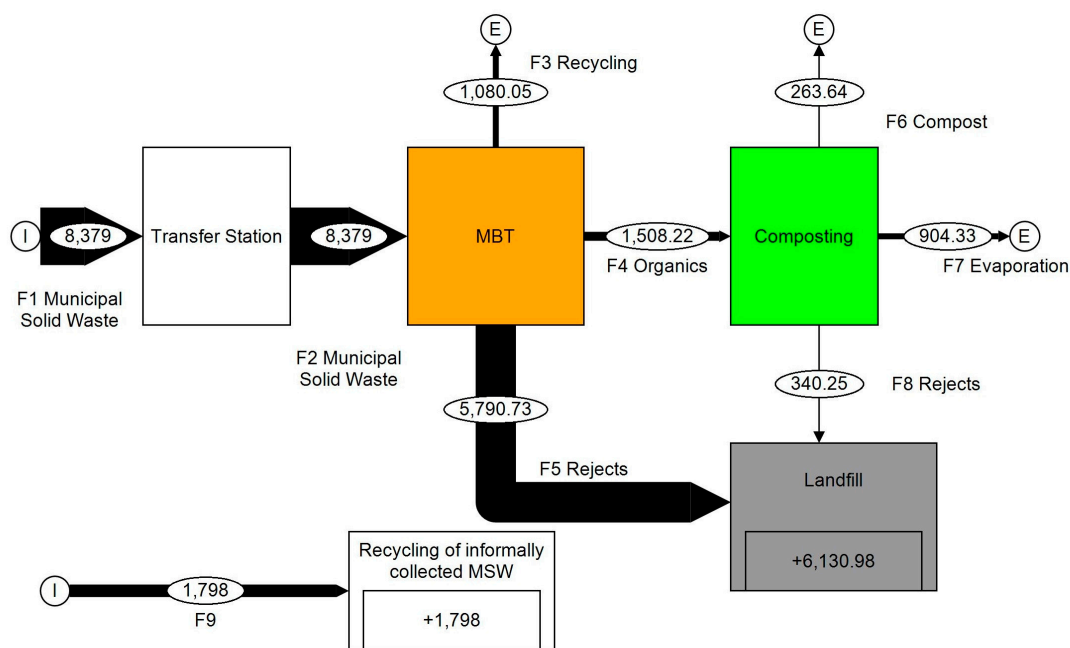

Table S3. Details of the flows of the MFD of MBT Scenario

| Table S3   | Details of the flows of the MFD                                                                                 |                                                                 |                                   |
|------------|-----------------------------------------------------------------------------------------------------------------|-----------------------------------------------------------------|-----------------------------------|
| Waste flow | Description                                                                                                     | Method of estimation                                            | Information source                |
| F1         | Collected mixed MSW                                                                                             | Figure reported by SEDEMA (2016)                                | SEDEMA (2016)                     |
| F2         | Collected mixed MSW delivered to transfer stations                                                              | Calculated by the authors based on the MSW composition Tabel 1. | Estimate by authors               |
| F3         | Sorted (manually and mechanically) recyclables sent to recycling (glass, plastics, paper and cardboard, metals) | Figure reported by Navarotto and Dominguez (2016)               | Estimate by authors               |
| F4         | Sorted through a trommel particles <90 mm, considered to be organics                                            | Figure reported by Navarotto and Dominguez (2016)               | Estimate by authors               |
| F5         | Sorted out non-recyclables                                                                                      | Calculated by the authors (F2-F3-F4)                            | Estimate by authors               |
| F6         | Produced compost                                                                                                | Figure reported by Navarotto and Dominguez (2016)               | Estimate by authors               |
| F7         | Evaporation (water and volatile solids)                                                                         | Figure reported by Navarotto and Dominguez (2016)               | Estimate by authors               |
| F8         | Residues to the landfill, which can't be composted                                                              | Calculated by the authors (F4-F6-F7)                            | Estimate by authors               |
| F9         | Collection by informal sector                                                                                   | Figure reported by Gómez Flores and Quintero, 2011              | (Gómez Flores and Quintero, 2011) |



4 Mass flow diagram (MFD) of Incineration Scenario

Figure S4. Mass flow diagram of Incineration Scenario

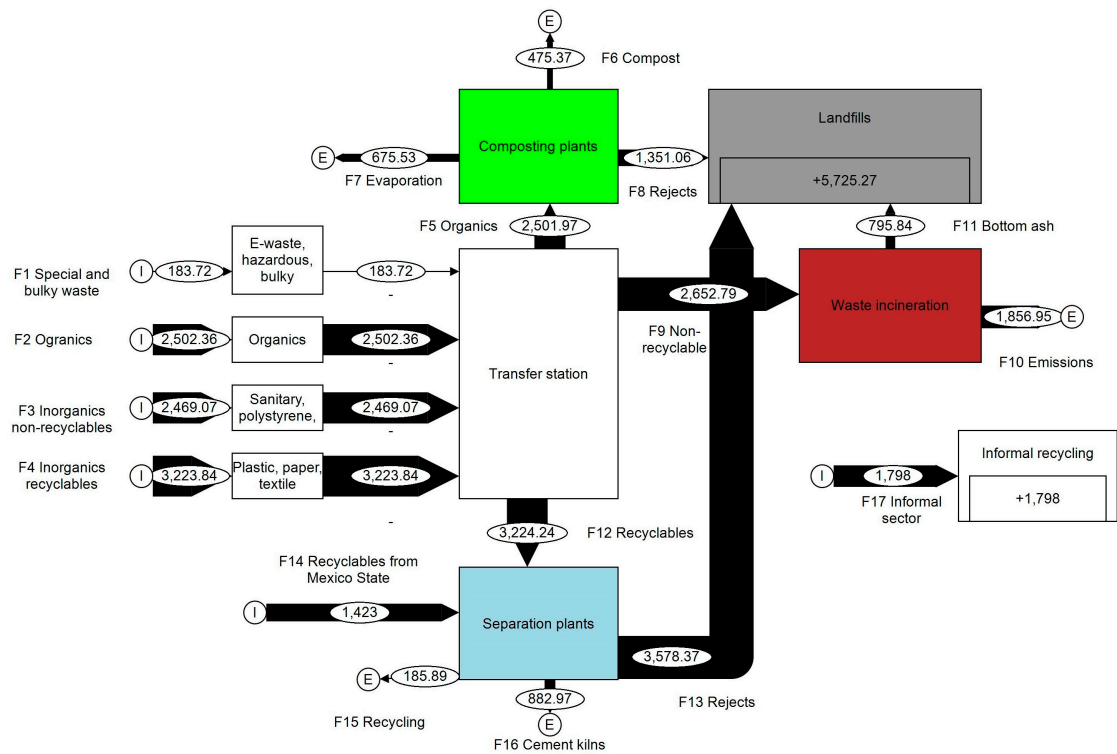

Table S4. Details of the flows of the MFD of incineration Scenario

| Table S4   | Details of the flows of the MFD                                                                            |                                                                                                                                            |                                                                                                                  |
|------------|------------------------------------------------------------------------------------------------------------|--------------------------------------------------------------------------------------------------------------------------------------------|------------------------------------------------------------------------------------------------------------------|
| Waste flow | Description                                                                                                | Method of estimation                                                                                                                       | Information source                                                                                               |
| F1         | MSW collected as "special and bulky waste" by municipal workers                                            | Calculated by the authors based on the MSW composition Tabel 1.                                                                            | Estimate by authors                                                                                              |
| F2         | MSW collected as "organics" by municipal workers                                                           | Calculated by the authors based on the MSW composition Tabel 1.                                                                            | Estimate by authors                                                                                              |
| F3         | MSW collected as "inorganics non-recyclables" by municipal workers                                         | Calculated by the authors based on the MSW composition Tabel 1.                                                                            | Estimate by authors                                                                                              |
| F4         | MSW collected as "inorganics recyclables" by municipal workers                                             | Calculated by the authors based on the MSW composition Tabel 1.                                                                            | Estimate by authors                                                                                              |
| F5         | Sorted organic fraction of MSW (OFMSW)                                                                     | Calculated by the authors based on the MSW composition Tabel 1.                                                                            | Estimate by authors                                                                                              |
| F6         | Produced compost ready for sale                                                                            | (19% of the input)<br>Estimated by authors based on SEDEMA (2016)                                                                          | SEDEMA (2016)                                                                                                    |
| F7         | Evaporation (water and volatile solids)                                                                    | (27% of the input) Figure estimated by authors based on Andersen et al (2010)                                                              | Estimate by authors based on Andersen et al (2010)                                                               |
| F8         | Residues to the landfill, which can't be composted                                                         | Calculated by the authors (F5-F6-F7)                                                                                                       | Estimate by authors                                                                                              |
| F9         | Non-recyclables collected separately                                                                       | Calculated by the authors based on the MSW composition Tabel 1.                                                                            | Estimate by authors                                                                                              |
| F10        | Emissions from waste incineration                                                                          | (70% of the input) Figure reported by Österreichisches Bundesministerium für Land- und Forstwirtschaft, Umwelt und Wasserwirtschaft (2015) | Estimate by Österreichisches Bundesministerium für Land- und Forstwirtschaft, Umwelt und Wasserwirtschaft (2015) |
| F11        | Bottom ash from waste incineration                                                                         | (30% of the input) Figure reported by Österreichisches Bundesministerium für Land- und Forstwirtschaft, Umwelt und Wasserwirtschaft (2015) | Estimate by Österreichisches Bundesministerium für Land- und Forstwirtschaft, Umwelt und Wasserwirtschaft (2015) |
| F12        | Recyclable material collected separately (plastics, paper, cardboard, all metals, glass, textile and wood) | Calculated by the authors based on the MSW composition Tabel 1.                                                                            | Estimate by authors                                                                                              |
| F13        | Rejected material from separation plants                                                                   | Figure reported by SEDEMA (2016)                                                                                                           | SEDEMA (2016)                                                                                                    |
| F14        | Recyclable material imported from Mexico State                                                             | Figure reported by SEDEMA (2016)                                                                                                           | SEDEMA (2016)                                                                                                    |
| F15        | Sorted material manually at separation plants, which go further to recycling                               | (4% of the input) Figure reported by SEDEMA (2016)                                                                                         | SEDEMA (2016)                                                                                                    |

|     |                                                                                                               |                                                                           |                                   |
|-----|---------------------------------------------------------------------------------------------------------------|---------------------------------------------------------------------------|-----------------------------------|
| F16 | Sorted material at separation plants, which is not suitable for recycling, but is used as RDF at cement kilns | (19% of the input) Figure reported by SEDEMA (2016)                       | SEDEMA (2016)                     |
| F17 | Collection by informal sector                                                                                 | (14% of MSW generated) Figure reported by Gómez Flores and Quintero, 2011 | (Gómez Flores and Quintero, 2011) |
